# Supplementary figures and images for: A systematic molecular dynamics approach to the structural characterization of amyloid aggregation propensity of β2-microglobulin mutant D76N
Source: Royal Society of Chemistry journal article supplement (doi:10.1039/c5mb00759c), 2015-12-22

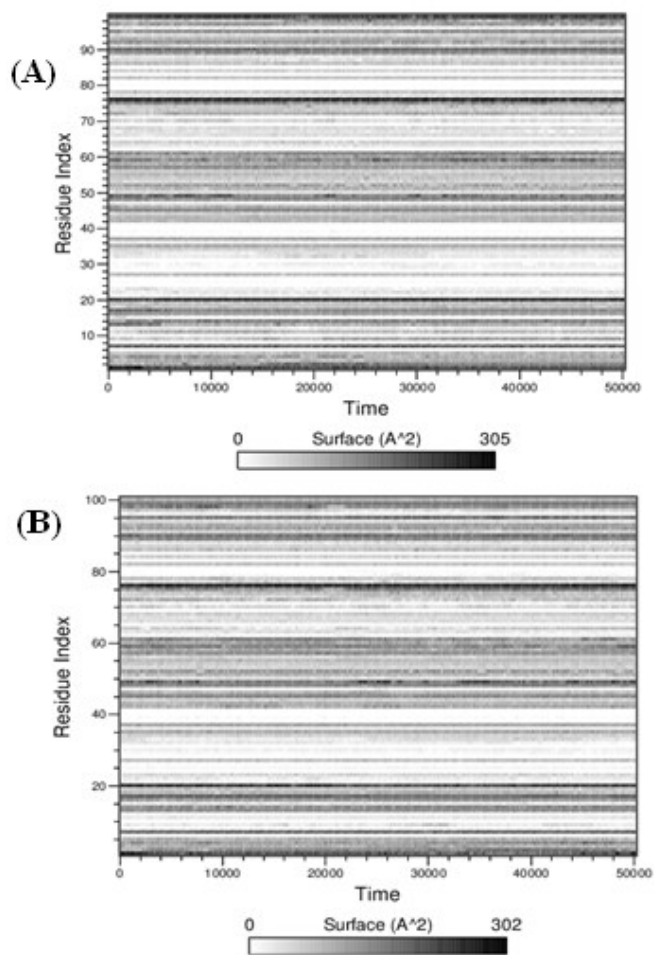

**Fig. 1** Accessible surface area of the WT-β2m (A) and its mutant D76N (B) during 50 ns simulation period

Supplement: c5mb00759c1.pdf [file c5mb00759c1.pdf]
